# Supplementary material for: A systematic review and meta-analysis of unimodal and multimodal predation risk assessment in birds
Source: PubMed Central journal article supplement (PMC11102462; doi:10.1038/s41467-024-48702-6), 2024-05-18
Supplement: 41467_2024_48702_MOESM1_ESM.pdf [file 41467_2024_48702_MOESM1_ESM.pdf]

**Supplementary Information for: A systematic review and meta-analysis of unimodal and multimodal predation risk assessment in birds**

Kimberley J. Mathot<sup>1,2</sup>, Josue David Arteaga-Torres<sup>1</sup>, Anne Besson<sup>1,3</sup>, Deborah M. Hawkshaw<sup>1</sup>, Natasha Klappstein<sup>1,4</sup>, Rebekah A. McKinnon<sup>1</sup>, Sheeraja Sridharan<sup>1</sup>, and Shinichi Nakagawa<sup>5,6</sup>

1. Department of Biological Sciences, University of Alberta, Edmonton, Alberta, Canada
2. Canada Research Chair in Integrative Ecology, Department of Biological Sciences, University of Alberta
3. Current address: Department of Zoology, University of Otago, New Zealand
4. Current address: Department of Statistics, Dalhousie University, Halifax, Nova Scotia, Canada
5. Evolution & Ecology Research Centre and School of Biological, Earth and Environmental Sciences, University of New South Wales, Sydney NSW 2052, Australia
6. Theoretical Sciences Visiting Program, Okinawa Institute of Science and Technology Graduate University, Onna, 904-0495, Japan

Figure S1: PRISMA flow chart showing the number of articles discovered and/or retained at each phase of the systematic review. All studies included in the meta-analysis are indicated with asterisks in the References section of the main text, and the list of all studies that were rejected after reading the full text can be found in Supplementary Information Table S3 including the reason for the rejection..... 2

Table S1. Descriptions of trait categories used for coding response variables. When the variable was scored in a way that was inverse to the investment in the trait it measured, the direction of the estimate was corrected by multiplying by -1 (indicated in parentheses following the example description as applicable). For example, inter-scan-interval is inversely related to investment in vigilance, and was therefore multiplied by -1. The predicted effect of an increased perceived predation risk on a category of response variable is indicated in the column “Predicted effect”. In order to allow to estimate global effects in our meta-analyses, all variables were coded so that effects in the predicted direction were positive. This means that estimates for categories where the predicted effect was “Decrease” were all multiplied by -1 prior to analysis. .... 3

Table S2. PRISMA Eco-Evo reporting checklist based on O'Dea, et al. <sup>1</sup>. .... 6

Table S3: List of studies that were excluded from the meta-analysis based on reading of full text, and their reasons for exclusion..... 12

Table S4: List of variables extracted from articles included in the meta-analysis and rationale. .... 14

Supplementary References..... 15

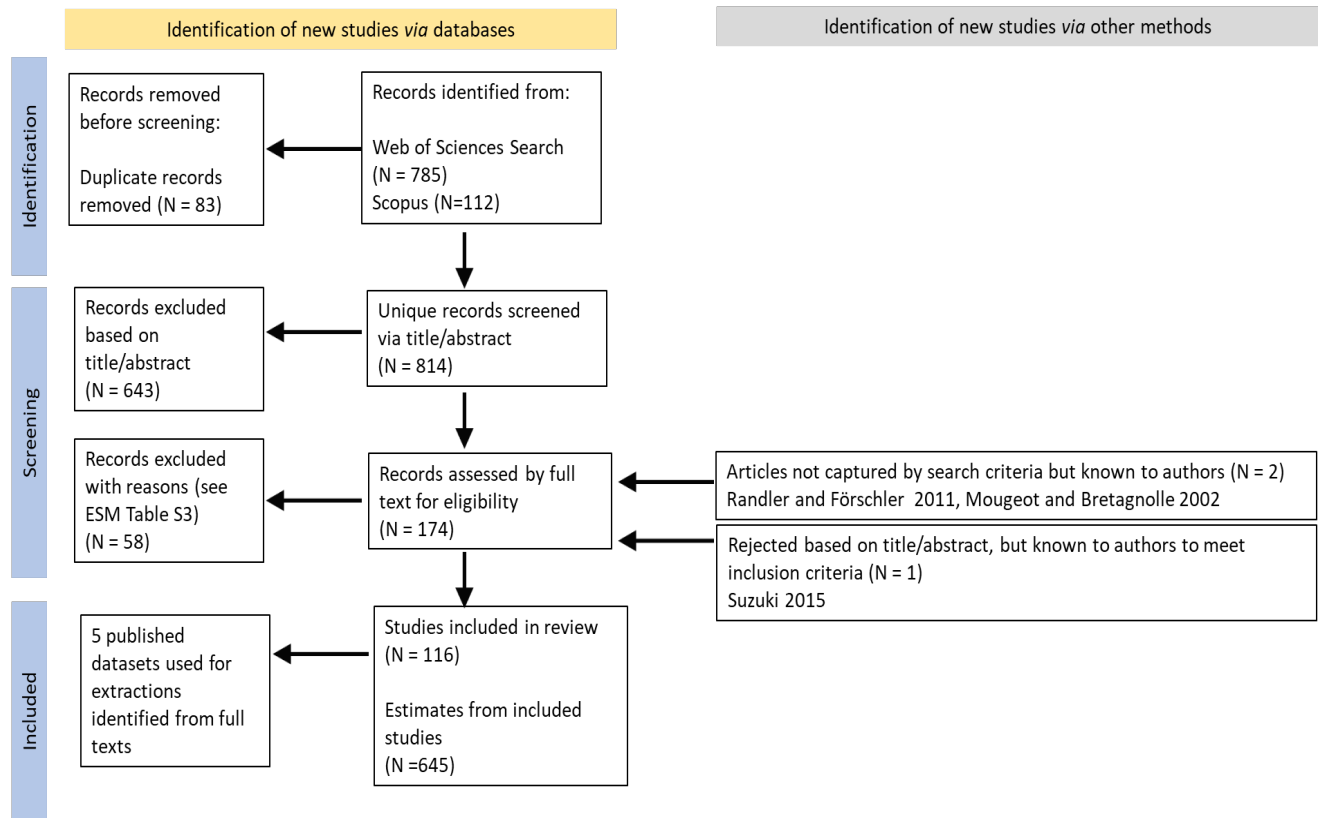

**Figure S1:** PRISMA flow chart showing the number of articles discovered and/or retained at each phase of the systematic review. All studies included in the meta-analysis are indicated with asterisks in the References section of the main text, and the list of all studies that were rejected after reading the full text can be found in Supplementary Information Table S3 including the reason for the rejection.

**Table S1.** Descriptions of trait categories used for coding response variables. When the variable was scored in a way that was inverse to the investment in the trait it measured, the direction of the estimate was corrected by multiplying by -1 (indicated in parentheses following the example description as applicable). For example, inter-scan-interval is inversely related to investment in vigilance, and was therefore multiplied by -1. The predicted effect of an increased perceived predation risk on a category of response variable is indicated in the column “Predicted effect”. In order to allow to estimate global effects in our meta-analyses, all variables were coded so that effects in the predicted direction were positive. This means that estimates for categories where the predicted effect was “Decrease” were all multiplied by -1 prior to analysis.

| Type      | Category<br>( <i>definition</i> )                                                                                                                                                                                                   | Subcategories                                  | Predicted Effect | Examples                                                                                                                                                                                                                                                                                                                                                                                                                                                                                                                                           |
|-----------|-------------------------------------------------------------------------------------------------------------------------------------------------------------------------------------------------------------------------------------|------------------------------------------------|------------------|----------------------------------------------------------------------------------------------------------------------------------------------------------------------------------------------------------------------------------------------------------------------------------------------------------------------------------------------------------------------------------------------------------------------------------------------------------------------------------------------------------------------------------------------------|
| Behaviour | Antipredator<br>( <i>Behaviours that mitigate predation risk by increasing likelihood of detecting predator, increasing likelihood of avoiding predator, or decreasing likelihood that predator can mount a successful attack</i> ) | Vigilance<br>Avoidance<br>Mobbing/<br>alarming | Increase         | Scanning rate<br>Inter-scan interval (-1)<br>Mean scan bout duration<br>Inspection behaviour<br>Choice of non-predator location<br>Choice of predator location (-1)<br>Use of cover<br>Avoidance of cover (-1)<br>Dispersal<br>Escape flight behaviour<br>Settlement (density of breeding pairs) (-1)<br>Settlement timing<br>Probability of building a nest (-1)<br>Nest abandonment<br>Time out of refuge (-1)<br>Freezing behaviour<br>Probability of approaching to speaker/mount<br>Call rate<br>Wing flicking<br>Recruitment of conspecifics |
|           | Costly Behaviours<br>( <i>Behaviours that expend net energy but that are not involved in mitigating predation risk</i> )                                                                                                            | Courtship<br>Activity                          | Decrease         | Number of songs<br>Songs per bird<br>Count of mate attraction calls<br>Duration of courtship display<br>Singing rate<br>Exploration<br>Number of movements<br>Latency to begin activity (-1)<br>Proportion of time active                                                                                                                                                                                                                                                                                                                          |
|           | Intake<br>( <i>Behaviours that bring in net energy</i> )                                                                                                                                                                            | Foraging<br>Begging                            | Decrease         | Foraging rates<br>Latency to resume feeding (-1)<br>Giving up density (-1)                                                                                                                                                                                                                                                                                                                                                                                                                                                                         |

|              |                                                                       |                                         |          |                                                                                                                                                                                                                                                                                                                                                  |
|--------------|-----------------------------------------------------------------------|-----------------------------------------|----------|--------------------------------------------------------------------------------------------------------------------------------------------------------------------------------------------------------------------------------------------------------------------------------------------------------------------------------------------------|
|              | <i>but that are not involved in mitigating predation risk)</i>        |                                         |          | Probability of returning to feeder (-1)<br>Begging per hour<br>Begging rate<br>Gapes per sec                                                                                                                                                                                                                                                     |
|              | Parental Care<br>( <i>Care provided to eggs or offspring</i> )        | Incubation/<br>brooding<br>Provisioning | Decrease | Number of incubation bouts<br>Mean incubation bout duration<br>Proportion of time incubating<br>Probability of abandoning nest (-1)<br>Number of brooding bouts<br>Total time brooding<br>Number/rate of incubation feeds<br>Provisioning rate<br>Provisioning biomass delivery<br>Provisioning load size<br>Latency to resume provisioning (-1) |
| Life History | Reproduction<br>( <i>Measures of reproductive success</i> )           | ClutchSize<br>EggSize<br>Nestlings      | Decrease | Clutch size<br>Mean clutch size<br>Clutch size change across years<br>Egg mass<br>Egg volume<br>Brood size<br>Number of nestlings<br>Number of fledglings<br>Hatching Success<br>Prop chicks dead (-1)<br>Prop eggs not hatched (-1)<br>Clutch mass<br>Fledging success<br>Brood mass<br>Hatching success                                        |
|              | Phenology<br>( <i>Measures of timing of key life history events</i> ) | LayDate<br>Developmental timing         | Increase | Lay date<br>Clutch initiation date<br>Nest initiation date<br>Duration of incubation<br>Duration of nestling<br>Age at fledging<br>Rate of ageing (telomere length)<br>Time to hatching                                                                                                                                                          |
| Physiology   | Condition<br>( <i>Measure of body condition of individuals</i> )      | Mass<br>Growth                          | Decrease | Morning mass<br>Average mass<br>Evening mass<br>Rate of mass gain (adults)<br>Lean mass<br>Fat mass<br>Body mass<br>Residual fat                                                                                                                                                                                                                 |

|  |                                                        |                |          |                                                                                                                             |
|--|--------------------------------------------------------|----------------|----------|-----------------------------------------------------------------------------------------------------------------------------|
|  |                                                        |                |          | Asymptotic body mass (nestlings)<br>Mass gain (nestlings)<br>Sing growth rate<br>Tarsus growth rate<br>Structural body size |
|  | Hormones<br><i>(Measure of hormone levels in vivo)</i> | Corticosterone | Increase | Corticosterone<br>Basal corticosterone<br>Stress corticosterone<br>Maximum corticosterone level                             |

**Table S2.** PRISMA Eco-Evo reporting checklist based on O'Dea, et al. <sup>1</sup>.

| Checklist item       | Sub-item number | Sub-item                                                                                                                                                                                                                                                                                              | Reported by authors? | Notes                                   |
|----------------------|-----------------|-------------------------------------------------------------------------------------------------------------------------------------------------------------------------------------------------------------------------------------------------------------------------------------------------------|----------------------|-----------------------------------------|
| Title and abstract   | 1.1             | Identify the review as a systematic review, meta-analysis, or both                                                                                                                                                                                                                                    | Yes                  |                                         |
|                      | 1.2             | Summarise the aims and scope of the review                                                                                                                                                                                                                                                            | Yes                  |                                         |
|                      | 1.3             | Describe the data set                                                                                                                                                                                                                                                                                 | Yes                  |                                         |
|                      | 1.4             | State the results of the primary outcome                                                                                                                                                                                                                                                              | Yes                  |                                         |
|                      | 1.5             | State conclusions                                                                                                                                                                                                                                                                                     | Yes                  |                                         |
|                      | 1.6             | State limitations                                                                                                                                                                                                                                                                                     | Yes                  |                                         |
| Aims and questions   | 2.1             | Provide a rationale for the review                                                                                                                                                                                                                                                                    | Yes                  |                                         |
|                      | 2.2             | Reference any previous reviews or meta-analyses on the topic                                                                                                                                                                                                                                          | Yes                  |                                         |
|                      | 2.3             | State the aims and scope of the review (including its generality)                                                                                                                                                                                                                                     | Yes                  |                                         |
|                      | 2.4             | State the primary questions the review addresses (e.g. which moderators were tested)                                                                                                                                                                                                                  | Yes                  |                                         |
|                      | 2.5             | Describe whether effect sizes were derived from experimental and/or observational comparisons                                                                                                                                                                                                         | Yes                  | Details provided in the methods section |
| Review registration  | 3.1             | Register review aims, hypotheses (if applicable), and methods in a time-stamped and publicly accessible archive and provide a link to the registration in the methods section of the manuscript. Ideally registration occurs before the search, but it can be done at any stage before data analysis. | No                   |                                         |
|                      | 3.2             | Describe deviations from the registered aims and methods                                                                                                                                                                                                                                              | No                   |                                         |
|                      | 3.3             | Justify deviations from the registered aims and methods                                                                                                                                                                                                                                               | No                   |                                         |
| Eligibility criteria | 4.1             | Report the specific criteria used for including or excluding studies when screening titles and/or abstracts, and full texts, according to the aims of the systematic review (e.g. study design, taxa, data availability)                                                                              | Yes                  |                                         |
|                      | 4.2             | Justify criteria, if necessary (i.e. not obvious from aims and scope)                                                                                                                                                                                                                                 | Yes                  |                                         |
| Finding studies      | 5.1             | Define the type of search (e.g. comprehensive search, representative sample)                                                                                                                                                                                                                          | Yes                  |                                         |

|                         |     |                                                                                                                                                                                                                                  |     |                                                                                                                     |
|-------------------------|-----|----------------------------------------------------------------------------------------------------------------------------------------------------------------------------------------------------------------------------------|-----|---------------------------------------------------------------------------------------------------------------------|
|                         | 5.2 | State what sources of information were sought (e.g. published and unpublished studies, personal communications)                                                                                                                  | Yes |                                                                                                                     |
|                         | 5.3 | Include, for each database searched, the exact search strings used, with keyword combinations and Boolean operators                                                                                                              | Yes |                                                                                                                     |
|                         | 5.4 | Provide enough information to repeat the equivalent search (if possible), including the timespan covered (start and end dates)                                                                                                   | Yes |                                                                                                                     |
| Study selection         | 6.1 | Describe how studies were selected for inclusion at each stage of the screening process (e.g. use of decision trees, screening software)                                                                                         | Yes |                                                                                                                     |
|                         | 6.2 | Report the number of people involved and how they contributed (e.g. independent parallel screening)                                                                                                                              | Yes |                                                                                                                     |
| Data collection process | 7.1 | Describe where in the reports data were collected from (e.g. text or figures)                                                                                                                                                    | Yes |                                                                                                                     |
|                         | 7.2 | Describe how data were collected (e.g. software used to digitize figures, external data sources)                                                                                                                                 | Yes |                                                                                                                     |
|                         | 7.3 | Describe moderator variables that were constructed from collected data (e.g. number of generations calculated from years and average generation time)                                                                            | Yes | Treatment duration calculated in days. Where duration < 1 day, proportion of day calculated assuming 12hr daylength |
|                         | 7.4 | Report how missing or ambiguous information was dealt with during data collection (e.g. authors of original studies were contacted for missing descriptive statistics, and/or effect sizes were calculated from test statistics) | Yes |                                                                                                                     |
|                         | 7.5 | Report who collected data                                                                                                                                                                                                        | Yes |                                                                                                                     |
|                         | 7.6 | State the number of extractions that were checked for accuracy by co-authors                                                                                                                                                     | Yes |                                                                                                                     |
| Data items              | 8.1 | Describe the key data sought from each study                                                                                                                                                                                     | Yes |                                                                                                                     |
|                         | 8.2 | Describe items that do not appear in the main results, or which could not be extracted due to insufficient information                                                                                                           | Yes |                                                                                                                     |
|                         | 8.3 | Describe main assumptions or simplifications that were made (e.g. categorising both 'length' and 'mass' as 'morphology')                                                                                                         | Yes |                                                                                                                     |

|                                        |      |                                                                                                                                                                                                                                                                |     |                                                                                                        |
|----------------------------------------|------|----------------------------------------------------------------------------------------------------------------------------------------------------------------------------------------------------------------------------------------------------------------|-----|--------------------------------------------------------------------------------------------------------|
|                                        | 8.4  | Describe the type of replication unit (e.g. individuals, broods, study sites)                                                                                                                                                                                  | Yes |                                                                                                        |
| Assessment of individual study quality | 9.1  | Describe whether the quality of studies included in the systematic review or meta-analysis was assessed (e.g. blinded data collection, reporting quality, experimental vs. observational)                                                                      | No  | All studies included were experimental                                                                 |
|                                        | 9.2  | Describe how information about study quality was incorporated into analyses (e.g. meta-regression and/or sensitivity analysis)                                                                                                                                 | No  | Information on quality was not incorporated into analyses                                              |
| Effect size measures                   | 10.1 | Describe effect size(s) used                                                                                                                                                                                                                                   | Yes | A reference for the effect size and its sampling variance was available, so no derivation was required |
|                                        | 10.2 | Provide a reference to the equation of each calculated effect size (e.g. standardised mean difference, log response ratio) and (if applicable) its sampling variance                                                                                           | Yes |                                                                                                        |
|                                        | 10.3 | If no reference exists, derive the equations for each effect size and state the assumed sampling distribution(s)                                                                                                                                               | NA  |                                                                                                        |
| Missing data                           | 11.1 | Describe any steps taken to deal with missing data during analysis (e.g. imputation, complete case, subset analysis)                                                                                                                                           | NA  | There were no missing data                                                                             |
|                                        | 11.2 | Justify the decisions made to deal with missing data                                                                                                                                                                                                           | NA  | There were no missing data                                                                             |
| Meta-analytic model description        | 12.1 | Describe the models used for synthesis of effect sizes                                                                                                                                                                                                         | Yes |                                                                                                        |
|                                        | 12.2 | The most common approach in ecology & evolution will be a random-effects model, often with a hierarchical/multilevel structure. If other types of models are chosen (e.g. common/fixed effects model, unweighted model), provide justification for this choice | Yes |                                                                                                        |
| Software                               | 13.1 | Describe the statistical platform used for inference (e.g. R)                                                                                                                                                                                                  | Yes |                                                                                                        |
|                                        | 13.2 | Describe the packages used to run models                                                                                                                                                                                                                       | Yes |                                                                                                        |
|                                        | 13.3 | Describe the functions used to run models                                                                                                                                                                                                                      | Yes |                                                                                                        |
|                                        | 13.4 | Describe any arguments that differed from the default settings                                                                                                                                                                                                 | Yes |                                                                                                        |
|                                        | 13.5 | Describe the version numbers of all software used                                                                                                                                                                                                              | Yes |                                                                                                        |
| Non-independence                       | 14.1 | Describe the types of non-independence encountered (e.g. phylogenetic, spatial, multiple measurements over time)                                                                                                                                               | Yes |                                                                                                        |



|                                           |      |                                                                                                                                                                                                                                                             |     |
|-------------------------------------------|------|-------------------------------------------------------------------------------------------------------------------------------------------------------------------------------------------------------------------------------------------------------------|-----|
|                                           | 14.2 | Describe how non-independence has been handled                                                                                                                                                                                                              | Yes |
|                                           | 14.3 | Justify decisions made                                                                                                                                                                                                                                      | Yes |
| Meta-regression and model selection       | 15.1 | Provide a rationale for the inclusion of moderators (covariates) that were evaluated in meta-regression models                                                                                                                                              | Yes |
|                                           | 15.2 | Justify the number of parameters estimated in models, in relation to the number of effect sizes and studies (e.g. interaction terms were not included due to insufficient sample sizes)                                                                     | Yes |
|                                           | 15.3 | Describe any process of model selection                                                                                                                                                                                                                     | Yes |
| Publication bias and sensitivity analyses | 16.1 | Describe assessments of the risk of bias due to missing results (e.g. publication, time-lag, and taxonomic biases)                                                                                                                                          | Yes |
|                                           | 16.2 | Describe any steps taken to investigate the effects of such biases (if present)                                                                                                                                                                             | Yes |
|                                           | 16.3 | Describe any other analyses of robustness of the results, e.g. due to effect size choice, weighting or analytical model assumptions, inclusion or exclusion of subsets of the data, or the inclusion of alternative moderator variables in meta-regressions | Yes |
| Clarification of <i>post hoc</i> analyses | 17.1 | When hypotheses were formulated after data analysis, this should be acknowledged.                                                                                                                                                                           | Yes |
| Metadata, data, and code                  | 18.1 | Share metadata (i.e. data descriptions)                                                                                                                                                                                                                     | Yes |
|                                           | 18.2 | Share data required to reproduce the results presented in the manuscript                                                                                                                                                                                    | Yes |
|                                           | 18.3 | Share additional data, including information that was not presented in the manuscript (e.g. raw data used to calculate effect sizes, descriptions of where data were located in papers)                                                                     | Yes |
|                                           | 18.4 | Share analysis scripts (or, if a software package with graphical user interface (GUI) was used, then describe full model specification and fully specify choices)                                                                                           | Yes |
| Results of study selection process        | 19.1 | Report the number of studies screened                                                                                                                                                                                                                       | Yes |
|                                           | 19.2 | Report the number of studies excluded at each stage of screening                                                                                                                                                                                            | Yes |
|                                           | 19.3 | Report brief reasons for exclusion from the full-text stage                                                                                                                                                                                                 | Yes |
|                                           | 19.4 | Present a Preferred Reporting Items for Systematic Reviews and Meta-Analyses (PRISMA)-like flowchart ( <a href="http://www.prisma-statement.org">www.prisma-statement.org</a> ).                                                                            | Yes |

|                                                     |      |                                                                                                                                                                                          |     |                                                                       |
|-----------------------------------------------------|------|------------------------------------------------------------------------------------------------------------------------------------------------------------------------------------------|-----|-----------------------------------------------------------------------|
| Sample sizes and study characteristics              | 20.1 | Report the number of studies and effect sizes for data included in meta-analyses                                                                                                         | Yes | The quality of studies included in the meta-analysis was not assessed |
|                                                     | 20.2 | Report the number of studies and effect sizes for subsets of data included in meta-regressions                                                                                           | Yes |                                                                       |
|                                                     | 20.3 | Provide a summary of key characteristics for reported outcomes (either in text or figures; e.g. one quarter of effect sizes reported for vertebrates and the rest invertebrates)         | Yes |                                                                       |
|                                                     | 20.4 | Provide a summary of limitations of included moderators (e.g. collinearity and overlap between moderators)                                                                               | Yes |                                                                       |
|                                                     | 20.5 | Provide a summary of characteristics related to individual study quality (risk of bias)                                                                                                  | NA  |                                                                       |
| Meta-analysis                                       | 21.1 | Provide a quantitative synthesis of results across studies, including estimates for the mean effect size, with confidence/credible intervals                                             | Yes |                                                                       |
| Heterogeneity                                       | 22.1 | Report indicators of heterogeneity in the estimated effect (e.g. $I^2$ , $\tau^2$ and other variance components)                                                                         | Yes |                                                                       |
| Meta-regression                                     | 23.1 | Provide estimates of meta-regression slopes (i.e. regression coefficients) and confidence/credible intervals                                                                             | Yes | No interactions were included                                         |
|                                                     | 23.2 | Include estimates and confidence/credible intervals for all moderator variables that were assessed (i.e. complete reporting)                                                             | Yes |                                                                       |
|                                                     | 23.3 | Report interactions, if they were included                                                                                                                                               | NA  |                                                                       |
|                                                     | 23.4 | Describe outcomes from model selection, if done (e.g. $R^2$ and AIC)                                                                                                                     | Yes |                                                                       |
| Outcomes of publication bias & sensitivity analyses | 24.1 | Provide results for the assessments of the risks of bias (e.g. Egger's regression, funnel plots)                                                                                         | Yes |                                                                       |
|                                                     | 24.2 | Provide results for the robustness of the review's results (e.g. subgroup analyses, meta-regression of study quality, results from alternative methods of analysis, and temporal trends) | Yes |                                                                       |
| Discussion                                          | 25.1 | Summarise the main findings in terms of the magnitude of effect                                                                                                                          | Yes |                                                                       |
|                                                     | 25.2 | Summarise the main findings in terms of the precision of effects (e.g. size of confidence intervals, statistical significance)                                                           | Yes |                                                                       |

|                           |      |                                                                                                                                                                     |     |                                     |
|---------------------------|------|---------------------------------------------------------------------------------------------------------------------------------------------------------------------|-----|-------------------------------------|
|                           | 25.3 | Summarise the main findings in terms of their heterogeneity                                                                                                         | Yes |                                     |
|                           | 25.4 | Summarise the main findings in terms of their biological/practical relevance                                                                                        | Yes |                                     |
|                           | 25.5 | Compare results with previous reviews on the topic, if available                                                                                                    | Yes |                                     |
|                           | 25.6 | Consider limitations and their influence on the generality of conclusions, such as gaps in the available evidence (e.g. taxonomic and geographical research biases) | Yes |                                     |
| Contributions and funding | 26.1 | Provide names, affiliations, and funding sources of all co-authors                                                                                                  | Yes |                                     |
|                           | 26.2 | List the contributions of each co-author                                                                                                                            | Yes |                                     |
|                           | 26.3 | Provide contact details for the corresponding author                                                                                                                | Yes |                                     |
|                           | 26.4 | Disclose any conflicts of interest                                                                                                                                  | NA  | There were no conflicts of interest |
| References                | 27.1 | Provide a reference list of all studies included in the systematic review or meta-analysis                                                                          | Yes |                                     |
|                           | 27.2 | List included studies as referenced sources (e.g. rather than listing them in a table or supplement)                                                                | Yes |                                     |

**Table S3:** List of studies that were excluded from the meta-analysis based on reading of full text, and their reasons for exclusion.

| Reference                            | Reason for Exclusion                                                                                                                                               |
|--------------------------------------|--------------------------------------------------------------------------------------------------------------------------------------------------------------------|
| Amo, et al. <sup>2</sup>             | Predator treatment is novel to focal species                                                                                                                       |
| Amo, et al. <sup>3</sup>             | Predator treatment is novel to focal species                                                                                                                       |
| Andreasson, et al. <sup>4</sup>      | Response variable (Tb) not replicated in other studies                                                                                                             |
| Antze and Koper <sup>5</sup>         | Mobbing calls used were generic response to humans                                                                                                                 |
| Atkins, et al. <sup>6</sup>          | Doesn't meet minimum sample size requirements. Level of analysis is "site", with N = 1 treatment and N = 2 control.                                                |
| Aviles, et al. <sup>7</sup>          | Mixed species level data                                                                                                                                           |
| Berziņš, et al. <sup>8</sup>         | No control treatment                                                                                                                                               |
| Blackwell, et al. <sup>9</sup>       | Results do not allow for extraction of effects for each level of treatment separately                                                                              |
| Breviglieri and Romero <sup>10</sup> | Mixed species level data.                                                                                                                                          |
| Cimprich, et al. <sup>11</sup>       | Season (migration) had insufficient independent studies for inclusion (K = 2)                                                                                      |
| Coslovsky and Richner <sup>12</sup>  | Not eligible – study of transgenerational effect of predator treatments. Traits investigated in nestlings that were not exposed to cues of predation directly.     |
| da Cunha, et al. <sup>13</sup>       | Mixed species level data                                                                                                                                           |
| Davies and Welbergen <sup>14</sup>   | Mixed species level data                                                                                                                                           |
| Dutour, et al. <sup>15</sup>         | Mixed species level data                                                                                                                                           |
| Fardell, et al. <sup>16</sup>        | Mixed species level data                                                                                                                                           |
| Forsman and Monkkonen <sup>17</sup>  | Mixed species level data                                                                                                                                           |
| Forsman, et al. <sup>18</sup>        | Mixed species level data                                                                                                                                           |
| Fransson and Weber <sup>19</sup>     | Season (migration) had insufficient independent studies for inclusion (K = 2)                                                                                      |
| Ghalambor and Martin <sup>20</sup>   | Mixed species level data                                                                                                                                           |
| Gomez-Serrano <sup>21</sup>          | Experimental portion of study used humans as "predator" treatment                                                                                                  |
| Griesser <sup>22</sup>               | for experiments 1: treatment and control observations cannot be compared (different observation durations), for experiment 2: testing information content of calls |
| Griesser <sup>23</sup>               | No control                                                                                                                                                         |
| Groenewoud, et al. <sup>24</sup>     | No predator treatment                                                                                                                                              |
| Holthuijzen <sup>25</sup>            | No relevant treatment, assessing if birds recognize heterospecific alarm calls                                                                                     |
| Hua, et al. <sup>26</sup>            | Mixed species level data                                                                                                                                           |
| Huang, et al. <sup>27</sup>          | Test of heterospecific information use                                                                                                                             |
| Hunts, et al. <sup>28</sup>          | Mixed species level data                                                                                                                                           |
| Ibanez-Alamo, et al. <sup>29</sup>   | Response type (fecal sac removals) not replicated in any other study. Also, no clear predicted direction of effect based on theory.                                |
| Iglesias, et al. <sup>30</sup>       | No control                                                                                                                                                         |
| Jones and Sieving <sup>31</sup>      | Species level data cannot be extracted for control/treatment contrasts                                                                                             |

|                                      |                                                                                                                                    |
|--------------------------------------|------------------------------------------------------------------------------------------------------------------------------------|
| Journey, et al. <sup>32</sup>        | No s.e. (standard error) provided for species level data                                                                           |
| Keen, et al. <sup>33</sup>           | Social learning of novel cue                                                                                                       |
| Kerman, et al. <sup>34</sup>         | No control                                                                                                                         |
| Leavesley and Magrath <sup>35</sup>  | No treatment: study tests whether trills convey predator information                                                               |
| Macleod, et al. <sup>36</sup>        | Response variable is cumulative mass gain expressed as percentage (i.e., control and treatment scaled to same range from 0 to 100) |
| Madden, et al. <sup>37</sup>         | mobbing calls used for treatment were generated in response to humans                                                              |
| Martinez, et al. <sup>38</sup>       | Could not extract species level data- figure resolution too low to extract overlapping data points                                 |
| McIntyre, et al. <sup>39</sup>       | Effect direction not extractable                                                                                                   |
| Morosinotto, et al. <sup>40</sup>    | response variable = testosterone excluded because no clear predicted effect (authors themselves stated no single prediction)       |
| Nilsson and Nord <sup>41</sup>       | Not relevant - no predator treatment                                                                                               |
| Nocera and Ratcliffe <sup>42</sup>   | Mixed species level data                                                                                                           |
| Pascual and Senar <sup>43</sup>      | Manipulation is distance to cover                                                                                                  |
| Poysa, et al. <sup>44</sup>          | Not relevant - no predator treatment                                                                                               |
| Rajala, et al. <sup>45</sup>         | No control                                                                                                                         |
| Rands and Cuthill <sup>46</sup>      | manipulation is human threat                                                                                                       |
| Roncalli, et al. <sup>47</sup>       | Response variables not relevant (egg touches, egg rejection)                                                                       |
| Schneider and Griesser <sup>48</sup> | Cannot extract behavioural response to treatments in isolation                                                                     |
| Serra and Fernandez <sup>49</sup>    | manipulation is human threat                                                                                                       |
| Sieving, et al. <sup>50</sup>        | Response variables is structure of acoustic response -species specific, not generalizable                                          |
| Thompson, et al. <sup>51</sup>       | Not relevant - no predator treatment                                                                                               |
| Tilgar and Moks <sup>52</sup>        | Mixed species level data                                                                                                           |
| Tilgar, et al. <sup>53</sup>         | manipulation is human threat                                                                                                       |
| Tolvanen, et al. <sup>54</sup>       | Not relevant - no predator treatment                                                                                               |
| Turney and Godin <sup>55</sup>       | Mixed species level data                                                                                                           |
| Tvardikova and Fuchs <sup>56</sup>   | Mixed species level data                                                                                                           |
| Williams and Lindell <sup>57</sup>   | Not relevant - no predator treatment                                                                                               |
| Williamson and Fagan <sup>58</sup>   | Mixed species level data                                                                                                           |
| Zanette, et al. <sup>59</sup>        | Response subcategory (cFOS levels) not used in any other study, also, no clear directional prediction                              |

**Table S4:** List of variables extracted from articles included in the meta-analysis and rationale.

| <b>Variable</b>                                                                 | <b>Rationale</b>                                                                                                                                                                                                                                                                                                                                                                                                                                                                                         |
|---------------------------------------------------------------------------------|----------------------------------------------------------------------------------------------------------------------------------------------------------------------------------------------------------------------------------------------------------------------------------------------------------------------------------------------------------------------------------------------------------------------------------------------------------------------------------------------------------|
| Publication year                                                                | Assessment of publication bias via time lag effect                                                                                                                                                                                                                                                                                                                                                                                                                                                       |
| Focal species                                                                   | To allow us to control for phylogeny in meta-regression                                                                                                                                                                                                                                                                                                                                                                                                                                                  |
| Predator (species name if single species, else “multi-species”)                 | Collected to provide more complete meta-data for review and cross checking “predator guild” variable.                                                                                                                                                                                                                                                                                                                                                                                                    |
| Predator guild (bird, mammal, fish, reptile, not specified, or multiple guilds) | To allow exploratory analyses of whether specific predator guilds elicit stronger responses than others.                                                                                                                                                                                                                                                                                                                                                                                                 |
| Adult or nest predator                                                          | To allow exploratory analyses of whether magnitude of response differs in response to adult versus nest/nestling predators.                                                                                                                                                                                                                                                                                                                                                                              |
| Setting of the study (field, lab, semi-natural)                                 | To allow exploratory analyses of whether magnitude of response differs as a function of study setting. If differences exist, this would have important implications for whether laboratory studies can be extrapolated to field conditions.                                                                                                                                                                                                                                                              |
| Treatment (A, O, V, or combination thereof)                                     | Key variables of interest to test: 1) whether different modalities of information elicit different response magnitudes consistent with assumption that different modalities provide different degrees of certainty about predation risk, and 2) to evaluate how response to multi-modal cues differ from responses to unimodal cues. Detailed rationale provided in introduction.                                                                                                                        |
| Season (breeding, non-breeding)                                                 | To allow exploratory analyses of effect of season (breeding versus non-breeding). For example, parents may value personal survival differently when                                                                                                                                                                                                                                                                                                                                                      |
| Type of comparison (within- or among-subject)                                   | To allow exploratory analyses of whether estimated effect sizes differ for within-versus among-subject designs based on the fact that within-subject designs are generally more powerful because they control for among-subject variability.                                                                                                                                                                                                                                                             |
| Treatment duration (days)                                                       | To allow exploratory analyses of effect of treatment duration. Longer treatments may elicit stronger responses for traits that are plastic over longer time scales (e.g., life history traits), but may elicit smaller response for traits that are highly plastic if longer exposure leads to habituation.                                                                                                                                                                                              |
| Control type (blank, disturbance, non-predator)                                 | To allow for exploratory analyses of whether control type effects estimated response to manipulations of perceived predation risk. Blank controls compare unmanipulated birds to birds following predator manipulations -and thus do not control for disturbance associated with conducting a treatment. “Disturbance” controls employ a matched disturbance (e.g., time that observer is present, presence of novel objects), or “non-predator” controls control for both non-biological and biological |
| Sex of focal individuals (male, female, both)                                   | To allow exploratory analyses of sex-related differences in response magnitude.                                                                                                                                                                                                                                                                                                                                                                                                                          |
| Age of focal individuals (A = Adults, N = Nestlings, J = Juveniles, E = Eggs)   | To allow exploratory analyses of age-related differences in response magnitude.                                                                                                                                                                                                                                                                                                                                                                                                                          |

## Supplementary References

- 1 O'Dea, R. E. *et al.* Preferred reporting items for systematic reviews and meta-analyses in ecology and evolutionary biology: a PRISMA extension. *Biol. Rev. Camb. Philos. Soc.* **96**, 1695-1722, doi:10.1111/brv.12721 (2021).
- 2 Amo, L., Caro, S. P. & Visser, M. E. Sleeping birds do not respond to predator odour. *Plos One* **6**, doi:10.1371/journal.pone.0027576 (2011).
- 3 Amo, L., Visser, M. E. & van Oers, K. Smelling out predators is innate in birds. *Ardea* **99**, 177-184, doi:10.5253/078.099.0207 (2011).
- 4 Andreasson, F., Nord, A. & Nilsson, J. A. Age-dependent effects of predation risk on night-time hypothermia in two wintering passerine species. *Oecologia* **189**, 329-337, doi:10.1007/s00442-018-04331-7 (2019).
- 5 Antze, B. & Koper, N. Noisy anthropogenic infrastructure interferes with alarm responses in Savannah sparrows (*Passerculus sandwichensis*). *R. Soc. Open Sci.* **5**, doi:10.1098/rsos.172168 (2018).
- 6 Atkins, A., Redpath, S. M., Little, R. M. & Amar, A. Experimentally manipulating the landscape of fear to manage problem animals. *J. Wildl. Manag.* **81**, 610-616, doi:10.1002/jwmg.21227 (2017).
- 7 Aviles, J. M., Parejo, D. & Exposito-Granados, M. Avian and rodent responses to the olfactory landscape in a Mediterranean cavity community. *Oecologia* **191**, 73-81, doi:10.1007/s00442-019-04487-w (2019).
- 8 Berziņš, A. *et al.* Mobbing as a trade-off between safety and reproduction in a songbird. *Behav. Ecol.* **21**, 1054-1060, doi:10.1093/beheco/arq104 (2010).
- 9 Blackwell, B. F., Seamans, T. W., Pfeiffer, M. B. & Buckingham, B. N. European Starling (*Sturnus vulgaris*) reproduction undeterred by predator scent inside nest boxes. *Can. J. Zool.* **96**, 980-986, doi:10.1139/cjz-2017-0299 (2018).
- 10 Breviglieri, C. P. B. & Romero, G. Q. Snakes and forbidden fruits: non-consumptive effects of snakes on the behaviors of frugivorous birds. *Behav. Ecol. Sociobiol.* **70**, 777-783, doi:10.1007/s00265-016-2101-7 (2016).
- 11 Cimprich, D. A., Woodrey, M. S. & Moore, F. R. Passerine migrants respond to variation in predation risk during stopover. *Anim. Behav.* **69**, 1173-1179, doi:10.1016/j.anbehav.2004.07.021 (2005).
- 12 Coslovsky, M. & Richner, H. Increased predation risk on mothers affects survival of parasites feeding on the offspring. *Anim. Behav.* **81**, 1071-1075, doi:10.1016/j.anbehav.2011.02.023 (2011).
- 13 da Cunha, F. C. R., Fontenelle, J. C. R. & Griesser, M. The presence of conspecific females influences male-mobbing behavior. *Behav. Ecol. Sociobiol.* **71**, doi:10.1007/s00265-017-2267-7 (2017).
- 14 Davies, N. B. & Welbergen, J. A. Cuckoo-hawk mimicry? An experimental test. *Proceedings of the Royal Society B-Biological Sciences* **275**, 1817-1822, doi:10.1098/rspb.2008.0331 (2008).
- 15 Dutour, M., Lena, J. P. & Lengagne, T. Mobbing behaviour varies according to predator dangerousness and occurrence. *Anim. Behav.* **119**, 119-124, doi:10.1016/j.anbehav.2016.06.024 (2016).
- 16 Fardell, L. L., Nano, C. E. M., Pavey, C. R. & Dickman, C. R. Small prey animal habitat use in landscapes of fear: Effects of predator presence and human activity along an urban disturbance gradient. *Front. Ecol. Evol.* **9**, doi:10.3389/fevo.2021.750094 (2021).

- 17 Forsman, J. T. & Monkkonen, M. Responses by breeding birds to heterospecific song and mobbing call playbacks under varying predation risk. *Anim. Behav.* **62**, 1067-1073, doi:10.1006/anbe.2001.1856 (2001).
- 18 Forsman, J. T., Monkkonen, M., Inkeroinen, J. & Reunanen, P. Aggregate dispersion of birds after encountering a predator: experimental evidence. *J. Avian Biol.* **29**, 44-48, doi:10.2307/3677339 (1998).
- 19 Fransson, T. & Weber, T. P. Migratory fuelling in blackcaps (*Sylvia atricapilla*) under perceived risk of predation. *Behav. Ecol. Sociobiol.* **41**, 75-80, doi:10.1007/s002650050366 (1997).
- 20 Ghalambor, C. K. & Martin, T. E. Fecundity-survival trade-offs and parental risk-taking in birds. *Science* **292**, 494-497, doi:10.1126/science.1059379 (2001).
- 21 Gomez-Serrano, M. A. Four-legged foes: dogs disturb nesting plovers more than people do on tourist beaches. *Ibis* **163**, 338-352, doi:10.1111/ibi.12879 (2021).
- 22 Griesser, M. Referential calls signal predator behavior in a group-living bird species. *Current Biology* **18**, 69-73, doi:10.1016/j.cub.2007.11.069 (2008).
- 23 Griesser, M. Do warning calls boost survival of signal recipients? Evidence from a field experiment in a group-living bird species. *Frontiers in Zoology* **10**, doi:10.1186/1742-9994-10-49 (2013).
- 24 Groenewoud, F., Kingma, S. A., Bebbington, K., Richardson, D. S. & Komdeur, J. Experimentally induced antipredator responses are mediated by social and environmental factors. *Behav. Ecol.* **30**, 986-992, doi:10.1093/beheco/arz039 (2019).
- 25 Holthuijzen, W. A. Stranger danger: Acoustic response of the Veery (*Catharus fuscescens*) via heterospecific eavesdropping on the Tufted Titmouse (*Baeolophus bicolor*). *Wilson Journal of Ornithology* **130**, 168-179, doi:10.1676/16-149.1 (2018).
- 26 Hua, F. Y., Fletcher, R. J., Sieving, K. E. & Dorazio, R. M. Too risky to settle: avian community structure changes in response to perceived predation risk on adults and offspring. *Proceedings of the Royal Society B-Biological Sciences* **280**, doi:10.1098/rspb.2013.0762 (2013).
- 27 Huang, P., Sieving, K. E. & St Mary, C. M. Heterospecific information about predation risk influences exploratory behavior. *Behav. Ecol.* **23**, 463-472, doi:10.1093/beheco/arr212 (2012).
- 28 Hunts, C., Heather, M., Martinez, A. E. & Parra, E. Experimental evidence of alarm eavesdropping on Amazonian mixed-flock followers by two social sentinel species: the dusky-throated antshrike (*Thamnomanes ardesicus*) and the cinereous antshrike (*T. schistogynus*). *Ornitol. Neotrop.* **30**, 224-228 (2019).
- 29 Ibanez-Alamo, J. D., Sanllorente, O., Arco, L. & Soler, M. Does nest predation risk induce parent birds to eat nestlings' fecal sacs? An experimental study. *Ann. Zool. Fenn.* **50**, 71-78, doi:10.5735/086.050.0106 (2013).
- 30 Iglesias, T. L., Stetkevitch, R. C. & Patricelli, G. L. Dead heterospecifics as cues of risk in the environment: Does size affect response? *Behaviour* **151**, 1-22, doi:10.1163/1568539x-00003120 (2014).
- 31 Jones, H. H. & Sieving, K. E. Foraging ecology drives social information reliance in an avian eavesdropping community. *Ecol. Evol.* **9**, 11584-11597, doi:10.1002/ece3.5561 (2019).
- 32 Journey, L., Drury, J. P., Haymer, M., Rose, K. & Blumstein, D. T. Vivid birds respond more to acoustic signals of predators. *Behav. Ecol. Sociobiol.* **67**, 1285-1293, doi:10.1007/s00265-013-1556-z (2013).
- 33 Keen, S. C., Cole, E. F., Sheehan, M. J. & Sheldon, B. C. Social learning of acoustic anti-predator cues occurs between wild bird species. *Proceedings of the Royal Society B-Biological Sciences* **287**, doi:10.1098/rspb.2019.2513 (2020).



- 34 Kerman, K., Sieving, K. E., St Mary, C. & Avery, M. L. Social conformity affects experimental measurement of boldness in male but not female monk parakeets (*Myiopsitta monachus*). *Behaviour* **155**, 1025-1050, doi:10.1163/1568539x-00003519 (2018).
- 35 Leavesley, A. J. & Magrath, R. D. Communicating about danger: urgency alarm calling in a bird. *Anim. Behav.* **70**, 365-373, doi:10.1016/j.anbehav.2004.10.017 (2005).
- 36 Macleod, R., Gosler, A. G. & Cresswell, W. Diurnal mass gain strategies and perceived predation risk in the great tit *Parus major*. *J. Anim. Ecol.* **74**, 956-964, doi:10.1111/j.1365-2656.2005.00993.x (2005).
- 37 Madden, J. R., Kilner, R. M. & Davies, N. B. Nestling responses to adult food and alarm calls: 1. Species-specific responses in two cowbird hosts. *Anim. Behav.* **70**, 619-627, doi:10.1016/j.anbehav.2004.11.019 (2005).
- 38 Martinez, A. E., Parra, E., Collado, L. F. & Vredenburg, V. T. Deconstructing the landscape of fear in stable multi-species societies. *Ecology* **98**, 2447-2455, doi:10.1002/ecy.1935 (2017).
- 39 McIntyre, E., Horn, A. G. & Leonard, M. L. Do nestling Tree Swallows (*Tachycineta bicolor*) respond to parental alarm calls? *Auk* **131**, 314-320, doi:10.1642/auk-13-235.1 (2014).
- 40 Morosinotto, C. *et al.* Maternal transfer of androgens in eggs is affected by food supplementation but not by predation risk. *J. Avian Biol.* **47**, 629-641, doi:10.1111/jav.00874 (2016).
- 41 Nilsson, J. A. & Nord, A. The use of the nest for parental roosting and thermal consequences of the nest for nestlings and parents. *Behav. Ecol. Sociobiol.* **71**, doi:10.1007/s00265-017-2400-7 (2017).
- 42 Nocera, J. J. & Ratcliffe, L. M. Migrant and resident birds adjust antipredator behavior in response to social information accuracy. *Behav. Ecol.* **21**, 121-128, doi:10.1093/beheco/arp161 (2010).
- 43 Pascual, J. & Senar, J. C. Differential effects of predation risk and competition over vigilance variables and feeding success in Eurasian siskins (*Carduelis spinus*). *Behaviour* **150**, 1665-1687, doi:10.1163/1568539x-00003114 (2013).
- 44 Poysa, H., Ruusila, V., Milonoff, M. & Virtanen, J. Ability to assess nest predation risk in secondary hole-nesting birds: an experimental study. *Oecologia* **126**, 201-207, doi:10.1007/s004420000512 (2001).
- 45 Rajala, M., Ratti, O. & Suhonen, J. Age differences in the response of willow tits (*Parus montanus*) to conspecific alarm calls. *Ethology* **109**, 501-509, doi:10.1046/j.1439-0310.2003.00890.x (2003).
- 46 Rands, S. A. & Cuthill, I. C. Separating the effects of predation risk and interrupted foraging upon mass changes in the blue tit *Parus caeruleus*. *Proceedings of the Royal Society B-Biological Sciences* **268**, 1783-1790, doi:10.1098/rspb.2001.1653 (2001).
- 47 Roncalli, G., Soler, M., Ruiz-Raya, F., Serrano-Martin, A. J. & Ibanez-Alamo, J. D. Predation risk affects egg-ejection but not recognition in blackbirds. *Behav. Ecol. Sociobiol.* **73**, doi:10.1007/s00265-019-2668-x (2019).
- 48 Schneider, N. A. & Griesser, M. The alarm call system of breeding Brown Thornbills (*Acanthiza pusilla*): self-defence or nest defence? *J. Ornithol.* **155**, 987-996, doi:10.1007/s10336-014-1085-1 (2014).
- 49 Serra, C. & Fernandez, G. J. Reduction of nestlings' vocalizations in response to parental alarm calls in the Southern house wren, *Troglodytes musculus*. *J. Ornithol.* **152**, 331-336, doi:10.1007/s10336-010-0595-8 (2011).
- 50 Sieving, K. E., Hetrick, S. A. & Avery, M. L. The versatility of graded acoustic measures in classification of predation threats by the tufted titmouse *Baeolophus bicolor*: exploring a mixed

- framework for threat communication. *Oikos* **119**, 264-276, doi:10.1111/j.1600-0706.2009.17682.x (2010).
- 51 Thompson, A. M. *et al.* The influence of fledgling location on adult provisioning: a test of the blackmail hypothesis. *Proceedings of the Royal Society B-Biological Sciences* **280**, doi:10.1098/rspb.2013.0558 (2013).
- 52 Tilgar, V. & Moks, K. Increased risk of predation increases mobbing intensity in tropical birds of French Guiana. *J. Trop. Ecol.* **31**, 243-250, doi:10.1017/s0266467415000061 (2015).
- 53 Tilgar, V., Saag, P., Kulavee, R. & Mand, R. Behavioral and physiological responses of nestling pied flycatchers to acoustic stress. *Horm. Behav.* **57**, 481-487, doi:10.1016/j.yhbeh.2010.02.006 (2010).
- 54 Tolvanen, J. *et al.* Interspecific information on predation risk affects nest site choice in a passerine bird. *BMC Evol. Biol.* **18**, doi:10.1186/s12862-018-1301-3 (2018).
- 55 Turney, S. & Godin, J. G. J. To forage or hide? Threat-sensitive foraging behaviour in wild, non-reproductive passerine birds. *Current Zoology* **60**, 719-728, doi:10.1093/czoolo/60.6.719 (2014).
- 56 Tvardikova, K. & Fuchs, R. Do birds behave according to dynamic risk assessment theory? A feeder experiment. *Behav. Ecol. Sociobiol.* **65**, 727-733, doi:10.1007/s00265-010-1075-0 (2011).
- 57 Williams, S. M. & Lindell, C. A. Nuclear species in Peruvian Amazonian mixed-species flocks are differentially attractive to transient species and to each other. *Wilson Journal of Ornithology* **130**, 131-139 (2018).
- 58 Williamson, J. L. & Fagan, M. E. Predator playback, foraging height, and phylogeny affect gap crossing behavior in tropical forest birds. *Ornitol. Neotrop.* **28**, 163-174 (2017).
- 59 Zanette, L. Y., Hobbs, E. C., Witterick, L. E., MacDougall-Shackleton, S. A. & Clinchy, M. Predator-induced fear causes PTSD-like changes in the brains and behaviour of wild animals. *Scientific Reports* **9**, doi:10.1038/s41598-019-47684-6 (2019).
